# Supplementary material
Source: Springer Nature journal article supplement (https://www.springermedizin.de/resource/supplementary/12889_2014_7014_MOESM5_ESM.pdf/9499610)

**a**

Funnel plot with pseudo 95% confidence limits

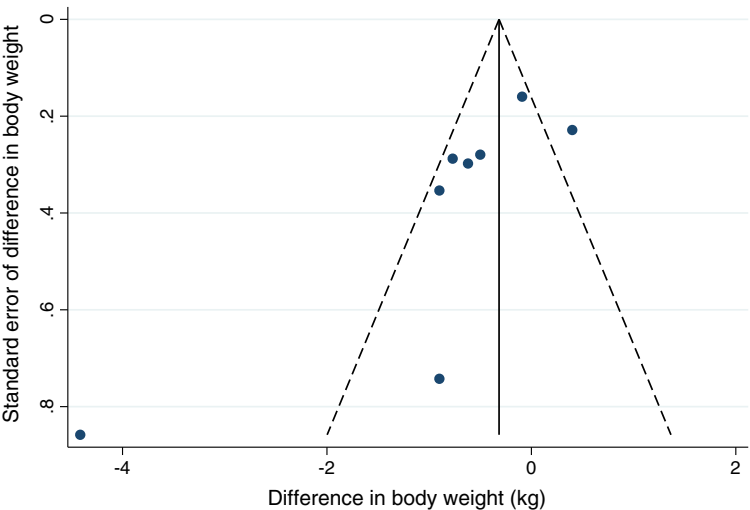**b**

Funnel plot with pseudo 95% confidence limits

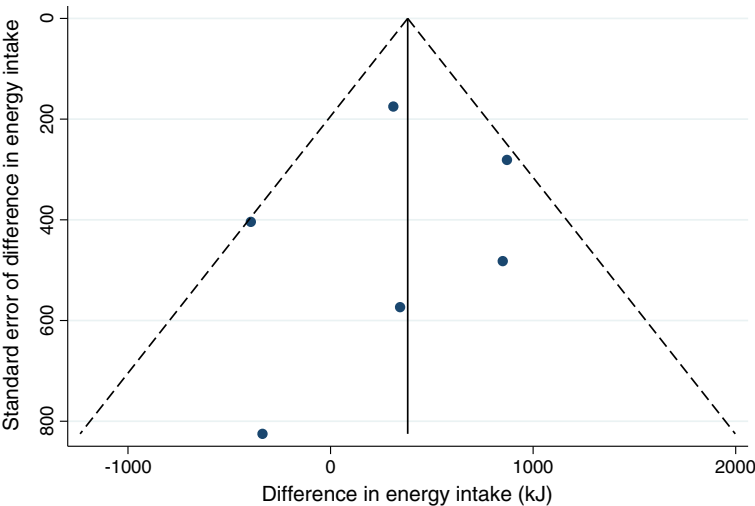

Supplement: MOESM5 [file 9499610]
